# Supplementary material
Source: HighWire-hosted journal article supplement (https://www.annfammed.org/highwire/filestream/7768/field_highwire_adjunct_files/2/Jaen_SuppApp2.pdf)
Supplement: Jaen_SuppApp2.pdf [file Jaen_SuppApp2.pdf]

**Online Supplementary Material**

Jaén CR, Crabtree BF, Palmer R, et al. Methods for evaluating practice change toward a patient-centered medical home. *Ann Fam Med*. 2010;8(Suppl 1):S9-S20.

[http://www.annfammed.org/cgi/content/full/8/Suppl\\_1/S9/DC1](http://www.annfammed.org/cgi/content/full/8/Suppl_1/S9/DC1)

---

**Supplemental Appendix 2. Medical Record Audit**

The appendix begins on the next page.

# Chart Review

## TransforMed Chart Review

Q1 **Site ID:**

Q2 **Clinician ID:**

Q3 **Patient ID:**

Q4 **Review timepoint**

First review (July 3, 2006) .....

Second review (April 1, 2007) .....

Third review (August 1, 2008) .....

Q5 **Index Visit Date**

Q6 **Date of first visit to practice?**

Q7 **Age**

Years .....

Months (<than or 35 months) .....

Q8 **Patient gender**

Male .....

Female .....

**Q9 Major reason for index visit (choose one)**

- Acute .....
- Chronic .....
- Well .....
- Prenatal .....
- Other .....

**Q10 Please indicate patient race**

- American Indian/Alaska Native .....
- Asian .....
- Native Hawaiian/Other Pacific Islander .....
- Black/African American .....
- White .....
- More than one race .....
- Not Noted .....

**Q11 Please indicate patient ethnicity**

- Hispanic or Latino .....
- Not Hispanic or Latino .....
- Not Noted .....

**Q12 Allergies prominently noted**

- Yes .....
- No .....

**Q13 Drug therapy for lowering cholesterol ( $\geq 10$ )**

- Yes .....
- No .....

**Q14 ASA therapy ( $\geq 35$ )**

- Up to Date .....
- Not Noted .....

ASA therapy: Date of last entry .....

**Q15 Screening flow sheet**

- Present .....
- Used .....
- Not Noted .....

Screening flow sheet: Date of last entry .....

**Q16 Health behavior counseling flow sheet**

- Present .....
- Used .....
- Not Noted .....

Health behavior counseling flow sheet: Date of last entry .....

**Q17 Chronic disease management flow sheet (e.g. HTN, DM, other)**

- Present .....
- Used .....
- Not Noted .....

Chronic disease management flow sheet: Date of last entry .

**Q18 Chronic Illness (choose all that apply)**

- HTN .....
- Diabetes .....
- Depression .....
- Anxiety .....
- CHF .....
- Prior MI .....
- CAD .....
- Stroke .....
- Hyperlipidemia .....
- COLD, COPD .....
- Cancer .....
- Chronic Renal Disease .....
- Hypothyroidism .....
- Tobacco Use Dependence .....
- Obesity .....
- Other .....

If other, what illness? .....

**Q19 Immunization flow sheet**

*Present* .....   
*Used* .....   
*Not Noted* .....

Immunization flow sheet: Date of last entry.....

# Immunizations

## Adults & Children over 6 years

**Q20 Influenza**

*Up to Date* .....   
*Not Noted* .....

Influenza: Date of last entry.....

**Q21 Pneumovax (PPV or Prevnar)**

*Up to Date* .....   
*Not Noted* .....

Pneumovax: Date of last entry .....

**Q22 2nd Measles Vaccine (MMR)**

*Up to Date* .....   
*Not Noted* .....

2nd Measle: Date of last entry.....

**Q23 Hepatitis B**

*Up to Date* .....   
*Not Noted* .....

Hepatitis B: Date of last entry.....

**Q24 Tetanus Booster (Tdap or Td)**

*Up to Date* .....   
*Not Noted* .....

Tetanus Booster: Date of last entry.....

## Children Only (6 and under) (Update based on ACIP/AAFP recommendations )

|            |                                       |                                                          |                          |  |
|------------|---------------------------------------|----------------------------------------------------------|--------------------------|--|
| <b>Q25</b> | <b>Influenza</b>                      |                                                          |                          |  |
|            | <i>Up to Date</i> .....               |                                                          | <input type="checkbox"/> |  |
|            | <i>Not Noted/Not up to date</i> ..... |                                                          | <input type="checkbox"/> |  |
|            | Influenza: Date of last entry .....   | <input style="width: 300px; height: 20px;" type="text"/> |                          |  |
| <b>Q26</b> | <b>Polio (IPV or OPV)</b>             |                                                          |                          |  |
|            | <i>Up to Date</i> .....               |                                                          | <input type="checkbox"/> |  |
|            | <i>Not Noted/Not up to date</i> ..... |                                                          | <input type="checkbox"/> |  |
|            | Polio: Date of last entry .....       | <input style="width: 300px; height: 20px;" type="text"/> |                          |  |
| <b>Q27</b> | <b>DTPor DTaP</b>                     |                                                          |                          |  |
|            | <i>Up to Date</i> .....               |                                                          | <input type="checkbox"/> |  |
|            | <i>Not Noted/Not up to date</i> ..... |                                                          | <input type="checkbox"/> |  |
|            | DTP orDTaP: Date of last entry .....  | <input style="width: 300px; height: 20px;" type="text"/> |                          |  |
| <b>Q28</b> | <b>HIB</b>                            |                                                          |                          |  |
|            | <i>Up to Date</i> .....               |                                                          | <input type="checkbox"/> |  |
|            | <i>Not Noted/Not up to date</i> ..... |                                                          | <input type="checkbox"/> |  |
|            | HIB: Date of last entry .....         | <input style="width: 300px; height: 20px;" type="text"/> |                          |  |
| <b>Q29</b> | <b>MMR</b>                            |                                                          |                          |  |
|            | <i>Up to Date</i> .....               |                                                          | <input type="checkbox"/> |  |
|            | <i>Not Noted</i> .....                |                                                          | <input type="checkbox"/> |  |
|            | MMR: Date of last entry .....         | <input style="width: 300px; height: 20px;" type="text"/> |                          |  |
| <b>Q30</b> | <b>Varicella</b>                      |                                                          |                          |  |
|            | <i>Up to Date</i> .....               |                                                          | <input type="checkbox"/> |  |
|            | <i>Not Noted/Not up to date</i> ..... |                                                          | <input type="checkbox"/> |  |
|            | Varicella: Date of last entry .....   | <input style="width: 300px; height: 20px;" type="text"/> |                          |  |

**Q31 Hepatitis B**  
Up to Date .....   
Not Noted/Not up to date .....   
Hepatitis B: Date of last entry .....

**Q32 PCV**  
Up to Date .....   
Not Noted/Not up to date .....   
PCV: Date of last entry .....

### Children Only Screening

**Q33 Eye exam (<6) (amblyopia/strabismus)**  
Up to Date .....   
Not Noted .....   
Eye exam: Date of last entry .....

**Q34 Lead screening (<2)**  
Up to Date .....   
Not Noted .....   
Lead screening: Date of last entry .....

**Q35 Lead screening (<2)**

|                       |                          |                          |
|-----------------------|--------------------------|--------------------------|
|                       | <i>Questionnaire</i>     | <i>Blood</i>             |
| Evidence of knowledge | <input type="checkbox"/> | <input type="checkbox"/> |

**Q36 Hemoglobin/Hematocrit (<=2)**  
Up to Date .....   
Not Noted .....   
Hemoglobin/Hematocrit: Date of last entry .....

### Index Visit

**Q37 Referred to others in index visit?**

- Yes .....
- No .....
- Not Applicable .....

If yes, specify.....

**Q38 Referred to community program?**

- Diet .....
- Exercise .....
- Tobacco .....
- Substance Abuse .....
- Other .....
- No .....

**Q39 Height**

- Feet/Length .....
- Inches/Length .....
- Height Not noted .....

**Q40 Weight**

- Pounds .....
- Ounces .....

**Q41 Systolic blood pressure**

- SBP Most recent .....
- SBP Previous .....

**Q42 Diastolic blood pressure**

- DBP Most recent .....
- DBP Previous .....

## Screening (2 yr look-back) [unless noted]



**Q43 PAP Q3yrs (F<sub>>13</sub>) or documentation of GYN care**

Up to Date .....   
Not Noted .....

PAP: Date of last entry .....

**Q44 Mammogram (F<sub>>40</sub>) or documentation of GYN care**

Up to Date .....   
Not Noted .....

Mammogram: Date of last entry .....

**Q45 Clinical Breast Exam(F<sub>>40</sub>) or documentation of GYN care**

Up to Date .....   
Not Noted .....

Breast exam: Date of last entry .....

**Q46 Sigmoidoscopy/ Barium Enema Q5yr (>50)if Colonoscopy not done**

Up to Date .....   
Not Noted .....

Sidmoidoscopy/ Barium Enema: Date of last entry .....

**Q47 Colonoscopy Q10yr (>50)**

Up to Date .....   
Not Noted .....

Evidence of knowledge .....

Colonoscopy: Date of last entry .....

**Q48 Home FOBT (≥ 50)**

Up to Date .....   
Not Noted .....

Home FOBT: Date of last entry .....

**Q49 Osteoporosis (>65) Dexa Scan**

Up to Date .....

Not Noted .....

Osteoporosis: Date of last entry .....

**Q50 Vision Screen (>65)**

Up to Date .....

Not Noted .....

Vision Screen: Date of last entry .....

**Q51 Hearing Screen (>65)**

Up to Date .....

Not Noted .....

Hearing screen: Date of last entry .....

**Q52 Tobacco Use (>10)**

Yes .....

No .....

Not Noted .....

**Q53 ETOH use (>10)**

Yes .....

No .....

Not Noted .....

**Q54 Injury Prevention (seatbelt, helmet, smoke detector, etc.)**

Up to Date .....

Not Noted .....

Injury Prevention: Date of last entry .....

## Labs

**Q55 PSA (M>40)**

Up to Date .....

Not Noted .....

PSA: Date of last entry .....

**Q56 Cholesterol ( $\geq 10$ )**

Cholesterol Most recent .....

Cholesterol Previous .....

Total cholesterol: Date of last entry .....

**Q57 HDL ( $\geq 10$ )**

HDL Most recent .....

HDL Previous .....

HDL: Date of last entry .....

**Q58 LDL ( $\geq 10$ )**

LDL Most recent .....

LDL Previous .....

LDL: Date of last entry .....

### Lab Diabetic Dx

**Q59 Glycosylated hemoglobin (A1c)**

A1c Most recent .....

A1c Previous .....

Glycosolated hemoglobin (A1c): Date of last entry .....

**Q60 Microalbumin**

Yes .....

No .....

Microalbumin: Date of last entry .....

### Visit History Diabetic Dx

**Q61 Dilated eye exam (or referral)?**

Yes .....

No .....

Dilated eye exam: Date of last entry .....

**Q62 Foot Exam (sensation, pulse, pin prick)?**

Yes .....   
No .....

Foot exam: Date of last entry .....

## Counseling 2 year look back

### Visit History

**Q63 Diet**

Up to Date .....   
Not Noted .....

Diet: Date of last entry .....

**Q64 Physical activity**

Up to Date .....   
Not Noted .....

Physical activity: Date of last entry .....

**Q65 Tobacco Hx ( $\geq 10$ )**

Up to Date .....   
Not Noted .....

Tobacco Hx: Date of last entry .....

**Q66 Tobacco counseling ( $\geq 10$ )**

Up to Date .....   
Not Noted .....

Tobacco counseling: Date of last entry .....

**Q67 Alcohol use and/or Substance Abuse Hx ( $\geq 10$ )**

Up to Date .....   
Not Noted .....

Alcohol use and/or Substance Abuse Hx: Date of last entry ..

**Q68 Alcohol use and/or Substance Abuse Counseling ( $\geq 10$ )**

Up to Date .....

Not Noted .....

Alcohol use and/or substance abuse counseling: Date of last entry .....

**Q69 STD/HIV prevention ( $\geq 10$ )**

Up to Date .....

Not Noted .....

STD/HIV prevention: Date of last entry .....

**Appropriate Treatment of URI:  
(All Patients)**

**Q70 Was there a visit for URI/Sinusitis/Bronchitis between Nov & Feb ?**

Yes .....

No .....

If yes, what date was this visit? .....

**Q71 Uncomplicated means the absence of the following, check all symptoms not present.**

Temperature  $>39$  (102) .....

Facial swelling .....

Severe facial pain .....

On immunosuppressant medication .....

Chronic sinusitis .....

**Q72 Antibiotics prescribed?**

Yes .....

No .....

**Depression**

**Q73 Date of initial diagnosis for this episode of depression care if since {date\_2yrback}.**

**Acute Phase Care (< 6 months ago)**

**Q74**     **Is there indication that depression diagnosis based on criteria (DSM-IV, PHQ-9, etc. )?**  
Yes .....   
No .....

**Q75**     **In the plan of care, was there recommended follow-up for depression or referral to mental health clinician?**  
Yes .....   
No .....

### **Continuation Phase Care (> 6 months but < 1 year ago)**

**Q76**     **Has regular follow-up (e.g. at least every 3 months) occurred either at practice or through referral?**  
Yes .....   
No .....

**Q77**     **If mental health referral, is there communication from them?**  
Yes .....   
No .....

**Q78**     **If follow-up visit occurred, was clinical course documented and/or care adjustment?**  
Yes .....   
No .....

### **Chronic Care (> 1 year ago)**

**Q79**     **Is there documentation in past year of actively addressing the diagnosis of depression?**  
Yes .....   
No .....
